# Supplementary material
Source: Springer Nature journal article supplement (https://www.springermedizin.de/resource/supplementary/12877_2013_996_MOESM3_ESM.pdf/9440884)

**a****Difference in Mean Scores****Variables****Mean(T3-T1) (95% CI)**

GAD-7 Anxiety Disorder Score (0-21)

-1.83 (-3.03, -0.62)

CES-D Depression Score (0-60)

-3.52 (-5.77, -1.27)

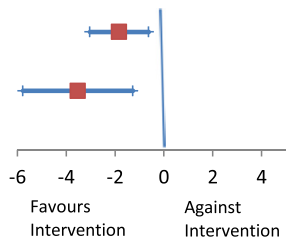**b****Difference in Mean Scores****Variables****Mean (T3-T1) (95% CI)**

SF-12 Physical Composite Index Score (0-100)

8.70 (3.65, 13.75)

SF-12 Physical Functioning Index Score (0-100)

6.88 (-0.37, 14.12)

SF-12 Role Limitation Physical Index Score (0-100)

15.47 (6.87, 24.07)

SF-12 Pain Index Score (0-100)

5.94 (-3.10, 14.98)

SF-12 General Health Index Score

-0.25 (-6.31, 5.81)

SF-12 Mental Health Composite Index Score (0-100)

8.96 (3.69, 14.23)

SF-12 Vitality Index Score (0-100)

8.75 (0.39, 17.11)

SF-12 Social Functioning Index Score (0-100)

4.38 (-8.57, 17.32)

SF-12 Role Limitation Emotional Index Score (0-100)

10.31 (1.09, 19.53)

SF-12 Mental Health Index Score (0-100)

10.00 (3.53, 16.47)

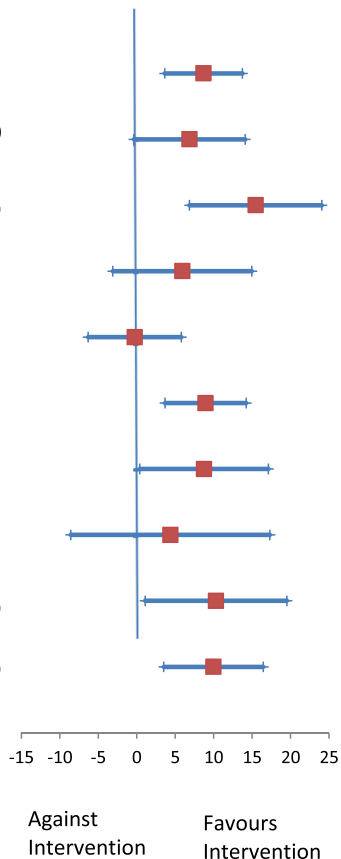

Supplement: MOESM3 [file 9440884]
